# Supplementary material for: Transitions in symbiosis: evidence for environmental acquisition and social transmission within a clade of heritable symbionts
Source: PubMed Central journal article supplement (PMC8443716; doi:10.1038/s41396-021-00977-z), 2021-05-03
Supplement: 41396_2021_977_MOESM1_ESM.pdf [file 41396_2021_977_MOESM1_ESM.pdf]

## Supplementary Information

Transitions in symbiosis: evidence for environmental acquisition & social transmission within a clade of heritable symbionts

Georgia C Drew<sup>1,3</sup>, Giles E Budge<sup>2</sup>, Crystal L Frost<sup>3</sup>, Peter Neumann<sup>4</sup>, Stefanos Siozios<sup>3</sup>, Orlando Yañez<sup>4</sup> & Gregory DD Hurst<sup>3</sup>

<sup>1</sup>Department of Zoology, University of Oxford, Oxford, UK

<sup>2</sup>School of Natural and Environmental Sciences, Newcastle University, Newcastle upon Tyne, UK

<sup>3</sup>Institute of Integrative Biology, University of Liverpool, Liverpool, UK

<sup>4</sup>Institute of Bee Health, Vetsuisse Faculty, University of Bern, Bern, Switzerland

Corresponding author: georgia.drew@zoo.ox.ac.uk

## Supplementary Methods

### Genomic analysis

In total, 53 core ribosomal protein coding genes were extracted from *Arsenophonus* from honey bees and compared to 12 available *Arsenophonus* genomes with the free-living species *Proteus mirabilis* and *Providencia stuartii* used as outgroups (see SI Table 1). Relatedness of strains was estimated by Bayesian inference on the bases of the concatenated alignment of the 53 ribosomal protein dataset, completed using Phylobayes-MPI [1] and the CAT-GTR model. Two independent chains were run in parallel for over 25,000 cycles each until convergence occurred (maxdiff < 0.1). A second phylogenetic analysis was performed on the concatenated set of 155 single-copy core orthologous proteins determined using OrthoFinder v2.3.11 [2]. In this case a maximum likelihood (ML) phylogenetic inference was conducted with IQ-TREE v2.0.3 [3] and the JTT+F+R3 model

31 selected using ModelFinder [4]. Robustness was assessed using the ultrafast bootstrap  
 32 approximation method as implemented in IQ-TREE and 1,000 replicates [5].

33 The metabolic potential of the *Arsenophonus* genome from honey bees was evaluated by  
 34 computing the KEGG module completion ratio (MCR) using Genomape-2.3.2 server [6] and  
 35 compared to other *Arsenophonus* strains as well as free-living (*Proteus mirabilis*,  
 36 *Providencia stuartii* and *Providencia rettgeri*) or symbiotic (*Candidatus Riesia pediculicola*)  
 37 relatives. In addition, the predicted protein sequences were grouped into Clusters of  
 38 Orthologous Groups (COG) functional categories using the eggNOG 5.0 database [7].  
 39 Contigs of putative phage origin were identified using the PHAge Search Tool Enhanced  
 40 Release (PHASTER) web server based on sequence similarities searches. Finally, the  
 41 synteny between the *Arsenophonus* genome from honey bees and the close relative  
 42 *Arsenophonus nasoniae* strain was assessed using D-Geneis [8] and minimap2 [9]. Data  
 43 visualisation was performed in R v3.6.3 [10] using ggplot2 package [11] while phylogenetic  
 44 trees were prepared using the EvoView 3 [12].

45

**SI Tab. 1 *Arsenophonus* genomes analysed for phylogenomics & comparative genomics**

| Strain                                                 | Accession ID                                                                      | Bases   | Status   |
|--------------------------------------------------------|-----------------------------------------------------------------------------------|---------|----------|
| <i>Arsenophonus</i> of <i>Apis mellifera</i>           | This study                                                                        | 3315916 | draft    |
| <i>Arsenophonus</i> of <i>Aphis craccivora</i>         | GCF_013460135.1                                                                   | 2424437 | complete |
| <i>Arsenophonus</i> of <i>Bemisia tabaci</i> Asia II 3 | GCF_004118055.1                                                                   | 2328823 | draft    |
| <i>Arsenophonus</i> of <i>Bemisia tabaci</i> Q2        | GCA_902713415.1                                                                   | 1860497 | draft    |
| <i>Arsenophonus</i> of <i>Aleurodicus dispersus</i>    | LR025108.1                                                                        | 663125  | complete |
| <i>Arsenophonus</i> of <i>Aleurodicus floccissimus</i> | GCF_900343025.1                                                                   | 3001875 | draft    |
| <i>Arsenophonus nasoniae</i> (DSM15247)                | AUCC01000000                                                                      | 3670548 | draft    |
| <i>Arsenophonus</i> of <i>Entylia carinata</i>         | NHNG00000000.1                                                                    | 3228533 | draft    |
| <i>Arsenophonus</i> of <i>Nilaparvata lugens</i>       | GCF_000757905.1                                                                   | 2953863 | draft    |
| <i>Arsenophonus</i> of <i>Lipoptena fortisetosa</i>    | CP013920.1                                                                        | 836724  | complete |
| <i>Candidatus Arsenophonus triatominarum</i>           | LWMI00000000                                                                      | 3858720 | draft    |
| <i>Arsenophonus nasoniae</i> (FIN)                     | GCA_004768525.1                                                                   | 5262212 | complete |
| <i>Arsenophonus melophagi</i>                          | <a href="http://users.prf.jcu.cz/novake01/">http://users.prf.jcu.cz/novake01/</a> | 1155312 | draft    |

## 46 **Honey bee maintenance & handling (laboratory conditions)**

47 Unless otherwise stated, under laboratory conditions Western honey bees were maintained on filter  
48 paper in plastic deli pot cages at 32°C ± 2 °C and incubators were kept dark. Ambrosia bee fondant  
49 and 50% sucrose solution were fed *ad libitum*. Where experiments required immobilisation of honey  
50 bees (e.g. for removal of tarsus tissue) this was done at 4°C. Marking of bees was done using queen  
51 paint.

52

## 53 **DNA extraction by Promega Wizard purification**

54 A Promega Wizard genomic DNA purification kit with a protocol modified for insects was used to  
55 extract DNA from honey bee samples. Samples were homogenised in nuclei lysis solution (250µl) and  
56 incubated for 30 min at 65°C. Protein precipitation solution (80µl) was added and samples were  
57 vortexed and held on ice (5 min). Samples were centrifuged (14,725 rpm, 4 min) and supernatant  
58 mixed with filtered isopropanol (150µl) via inversion. After further centrifugation (14,725 rpm, 2 min),  
59 supernatants were discarded and 70% EtOH (150µl) added to pellets, before gentle vortexing and  
60 centrifugation (14,800rpm, 1 min). Supernatants were discarded and pellets airdried (65°C, 30 min)  
61 before resuspension in molecular grade H<sub>2</sub>O (60µl) at 4°C overnight.

62

## 63 **PCR cycling & sequencing conditions**

64 Polymerase chain reaction assays (PCR) were based on a total volume of 15µl, containing GoTaq  
65 Hot Start Green Master Mix (7.5µl), nuclease free water (5.5µl), forward and reverse 10µM primer  
66 (0.5µl) and template DNA (1µl). PCR amplifications were performed on Applied Biosystem Veriti  
67 cyclor under the following conditions: 95°C for 2 min, 35 cycles at 94°C for 30 s, 58°C for 30 s  
68 (variable, depending on primer T<sub>m</sub>) 72°C for 1 min with a final extension of 72°C for 10 min. Primers  
69 used for detection of *Arsenophonus* targeted *fbaA* (5' -GCCGCTAAGGTTGGTTCTCC – 3' and 5' -  
70 CCTGAACCACCATGGAAAACAAAA – 3') and were adapted from a previous study [13]. Products  
71 were visualised on 1.5% w/v agarose gel with 0.5µg/mL ethidium bromide (110 v for 50 min) Every  
72 run included a positive, negative and no template control. Where samples were to be sequenced,  
73 PCR products were cleaned of unincorporated primers and nucleotides using 0.2µl of SAP (shrimp  
74 alkaline phosphatase), 0.05µl of Exonuclease I, 0.7µl of 10X RX Buffer and 1.05µl of molecular grade  
75 H<sub>2</sub>O and incubated at 37°C for 45 min, followed by 80°C for 15 min. Purified products were Sanger  
76 sequenced through both strands in house on an ABI Prism 3010x or outsourced to GATC Biotech.

77

## 78 **Validation of *Arsenophonus* PCR assay sensitivity**

79 Sensitivity of the detection method for *Arsenophonus* was assessed by serial dilution of  
80 *Arsenophonus* template with uninfected honey bee template DNA. In all tested cases (N = 6)

81 *Arsenophonus* DNA remained detectable at  $10^{-1}$  and  $10^{-2}$  dilutions, in 4/6 cases *Arsenophonus* was  
82 detectable at  $10^{-3}$  and  $10^{-4}$  dilutions of honey bee template, providing confidence in the sensitivity of  
83 our detection method.

84

#### 85 **Localisation of *Arsenophonus* within the gut**

86 To visualise *Arsenophonus* using fluorescence in situ hybridization (FISH), whole guts were  
87 dissected from live worker bees (chilled on ice) and placed into Carnoy's fixative (60%  
88 EtOH, 30% chloroform, 10% acetic acid) for 24–48hrs, washed with 100% EtOH (x 3) and  
89 incubated with hybridization buffer (20Mm Tris-HCL, 0.9M NaCl, 0.01% SDS, 30%  
90 formamide, 100 pmol/ml probe) at room temperature in the dark (~15 hrs). The symbiont  
91 was targeted using an *Arsenophonus* specific probe (TCATGACCACAACCTCCA) [14] with  
92 a 5' Alexa Fluor 647 fluorochrome. Tissues were washed with pre-heated (~48°C) buffer  
93 (20Mm Tris-HCL, 0.9M NaCl, 0.01% SDS, 0.05M EDTA) x 3 for 10 min (room temperature,  
94 dark) and mounted on glass slides with DAPI containing ProLong Diamond anti-fade (Fisher  
95 Scientific).

96

#### 97 **Selection criteria for colonies used in infection maintenance & social transmission** 98 **experiments**

99 As the *Arsenophonus* status of individual bees included in the infection maintenance and social  
100 transmission experiment could not be pre-determined (demands destructive sampling), we selected  
101 individuals from colonies with a threshold *Arsenophonus* prevalence of 85%. For each colony this was  
102 determined by screens of 15 worker bees individually. Samples were washed in sterile H<sub>2</sub>O and  
103 exposed to ultra violet (UV) light for 10 minutes to cross link contaminating external DNA. DNA was  
104 extracted using a Promega Wizard genomic DNA purification kit with a protocol modified for insects  
105 and screened for *Arsenophonus* using PCR assays (as described above). Workers used in negative  
106 control assays were from colonies where no adult worker had returned a positive result for  
107 *Arsenophonus* detection. For the social transmission study, a sample of NEWs (although generally  
108 considered sterile [15] and rarely associated with *Arsenophonus*, see main text Figure 6) were  
109 similarly screened to ensure *Arsenophonus* was not present prior to mixing with infected conspecifics.  
110 For the transmission experiment, 85% and 0% were thus taken as a proxy starting prevalence (dotted  
111 lines on main text Figure 8) for workers and NEWs respectively.

112

113

114

115  
116  
117  
118

## Supplementary Results

0.01  
I

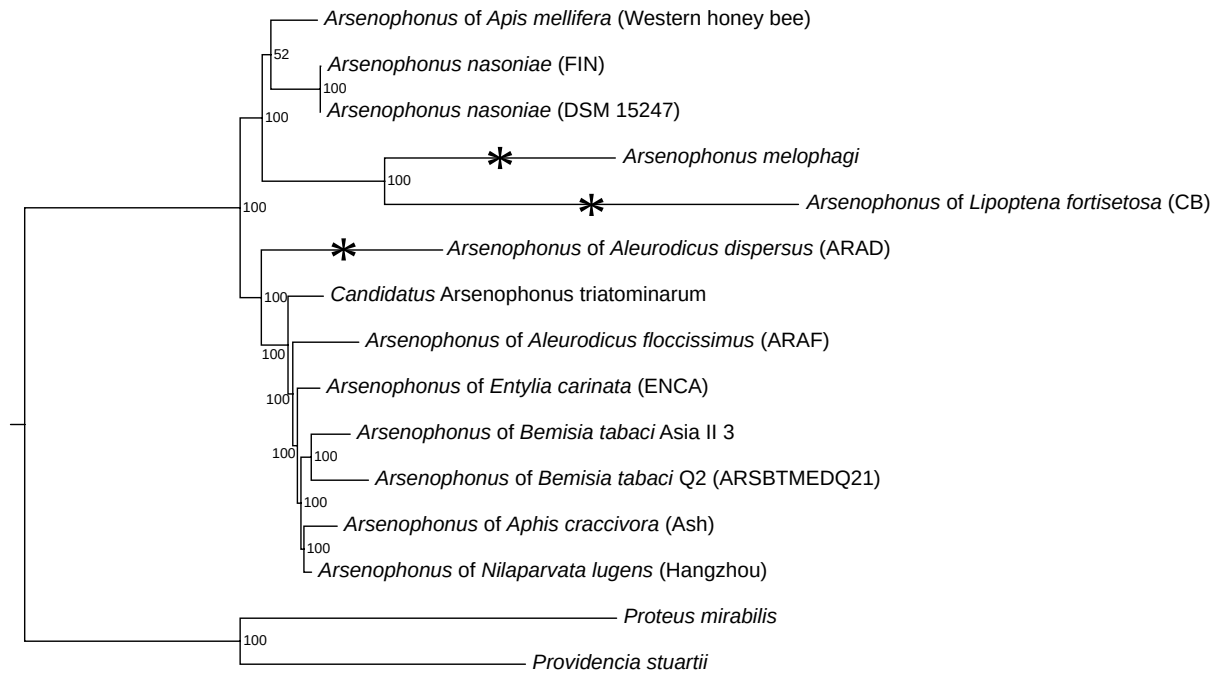

119  
120  
121  
122  
123  
124  
125  
126  
127  
128  
129  
130  
131

**SI Fig. 1 *Arsenophonus* phylogeny based on 115 single-copy core gene.** Both phylogenomic reconstructions using the set of 53 ribosomal proteins (main text) or a set of single-copy core genes (this figure) supported the position of the honey bee *Arsenophonus* in the wider clade and its relation to the son-killer species *Arsenophonus nasoniae*

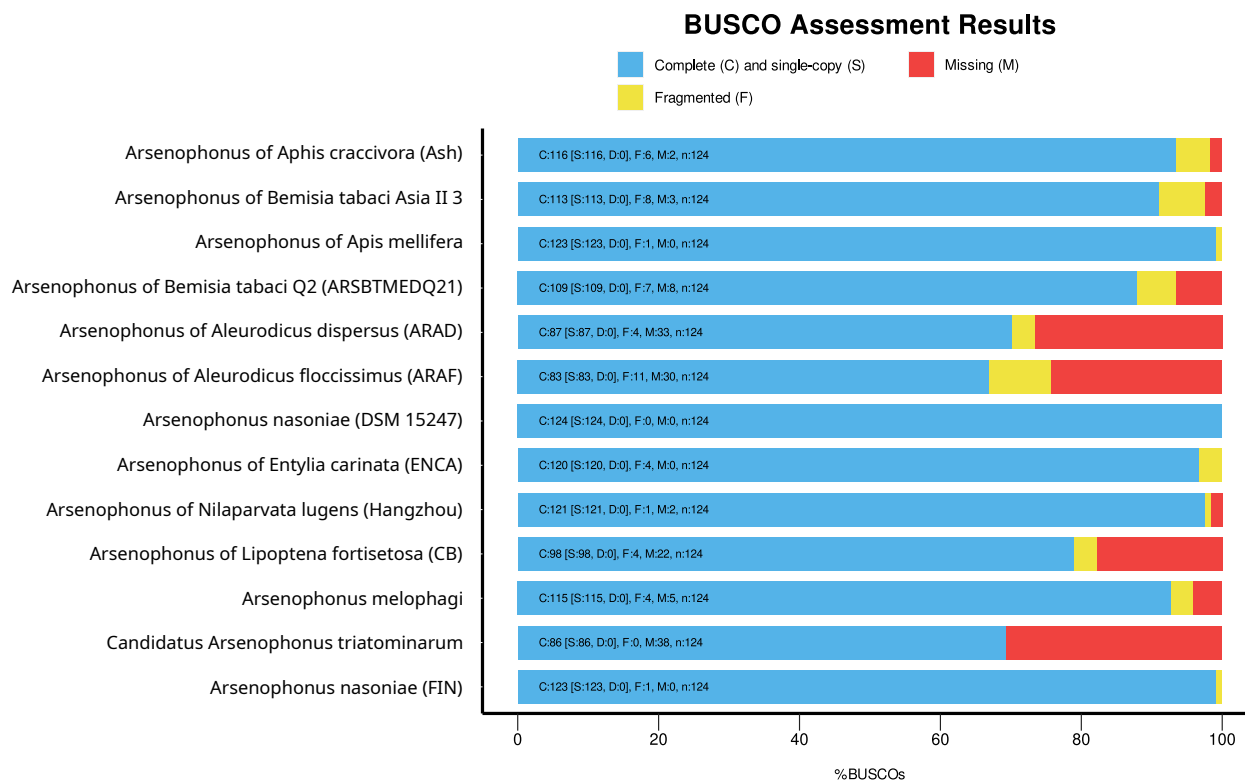

133

134 **SI Fig.2 Assessment of genome assembly for *Arsenophonus* of *Apis mellifera*.** BUSCO  
 135 assessment of genome assembly completeness for *Arsenophonus* from *Apis mellifera* (this study)  
 136 suggest a near complete genome. BUSCO scores for twelve other available *Arsenophonus* genomes  
 137 (see SI Tab.1) are shown alongside for comparison.

138

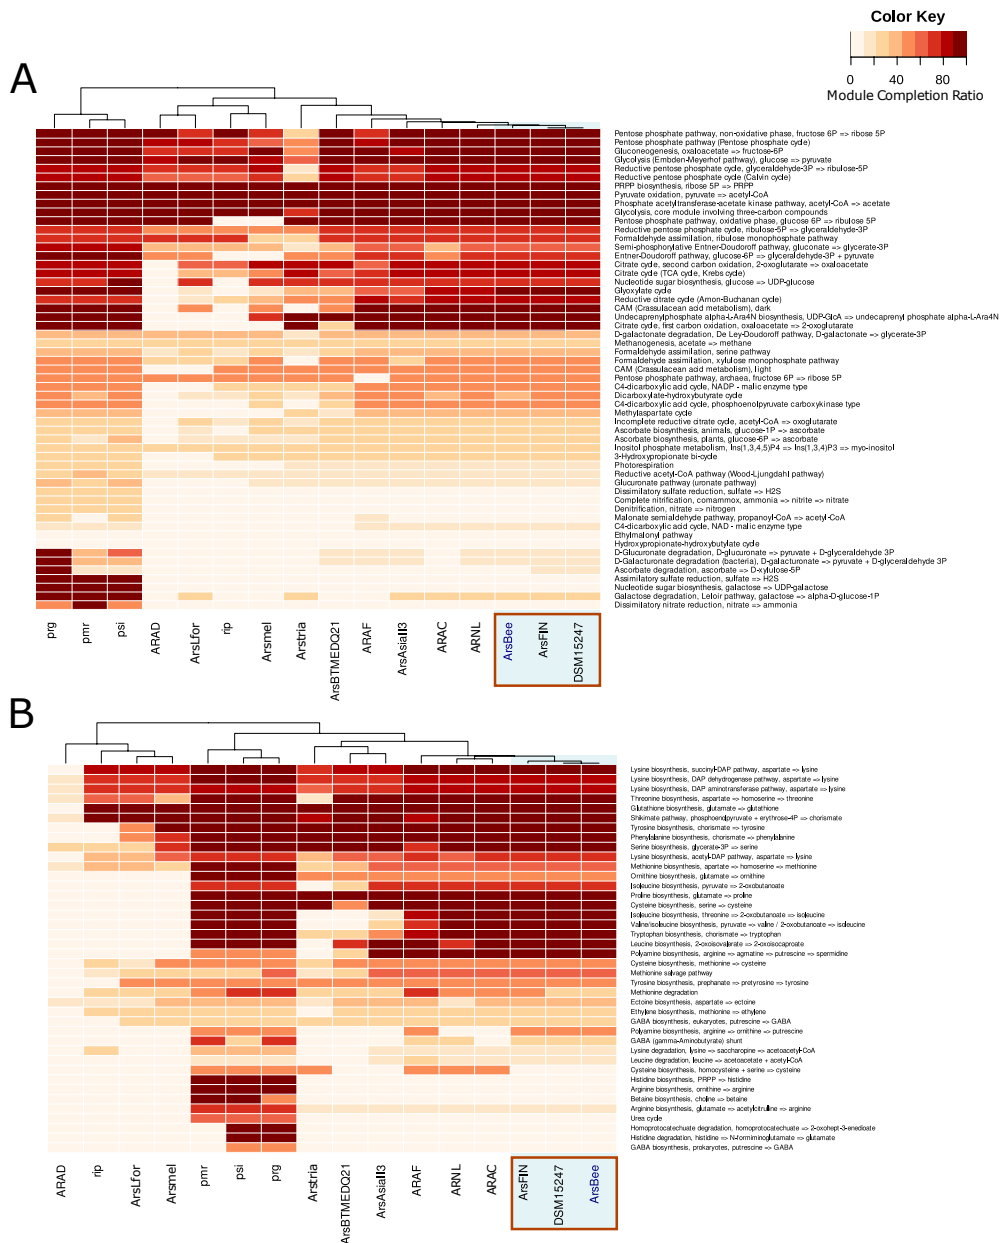

139

140 **SI Fig.3 The metabolic potential of *Arsenophonus* strains and comparison to free-living or**  
 141 **142 symbiotic relatives. (A) Carbohydrate and energy metabolism and (B) amino acid metabolism. The**  
 143 **module completion ratio (MCR) for each KEGG functional category was calculated using Genomaple-**  
 144 **2.3.2. Dendrograms represent hierarchical clustering of the analysed microbial genomes based on the**  
 145 **MCRs values. The clustering of ArsBeeCH strain with previously sequenced *Arsenophonus nasoniae***  
 146 **strains is highlighted. pmr: *Proteus mirabilis* HI4320, psi: *Providencia stuartii* MRSN 2154, prg:**  
 147 ***Providencia rettgeri* RB151, rip: *Candidatus Riesia pediculicola*, ArsFIN: *Arsenophonus nasoniae***  
 148 **(FIN), ArsBeeCH: *Arsenophonus* of *Apis mellifera*, DSM15247: *Arsenophonus nasoniae***  
 149 **ARAD; *Arsenophonus* of *Aleurodicus dispersus*, Arstria: *Candidatus Arsenophonus triatominarum*,**  
 150 **ARAF: *Arsenophonus* of *Aleurodicus floccissimus*, ArsAsiall3: *Arsenophonus* of *Bemisia tabaci* Asia II**  
 151 **3, ArsBTMEDQ21: *Arsenophonus* of *Bemisia tabaci* Q2, ARAC: *Arsenophonus* of *Aphis craccivora*,**  
 152 **ARNL: *Arsenophonus* of *Nilaparvata lugens*. Due to its highly fragmented status (818 contigs) the**  
 153 **genome of *Arsenophonus* of *Entylia carinata* (ENCA) was excluded from this analysis.**

154

155  
156  
157

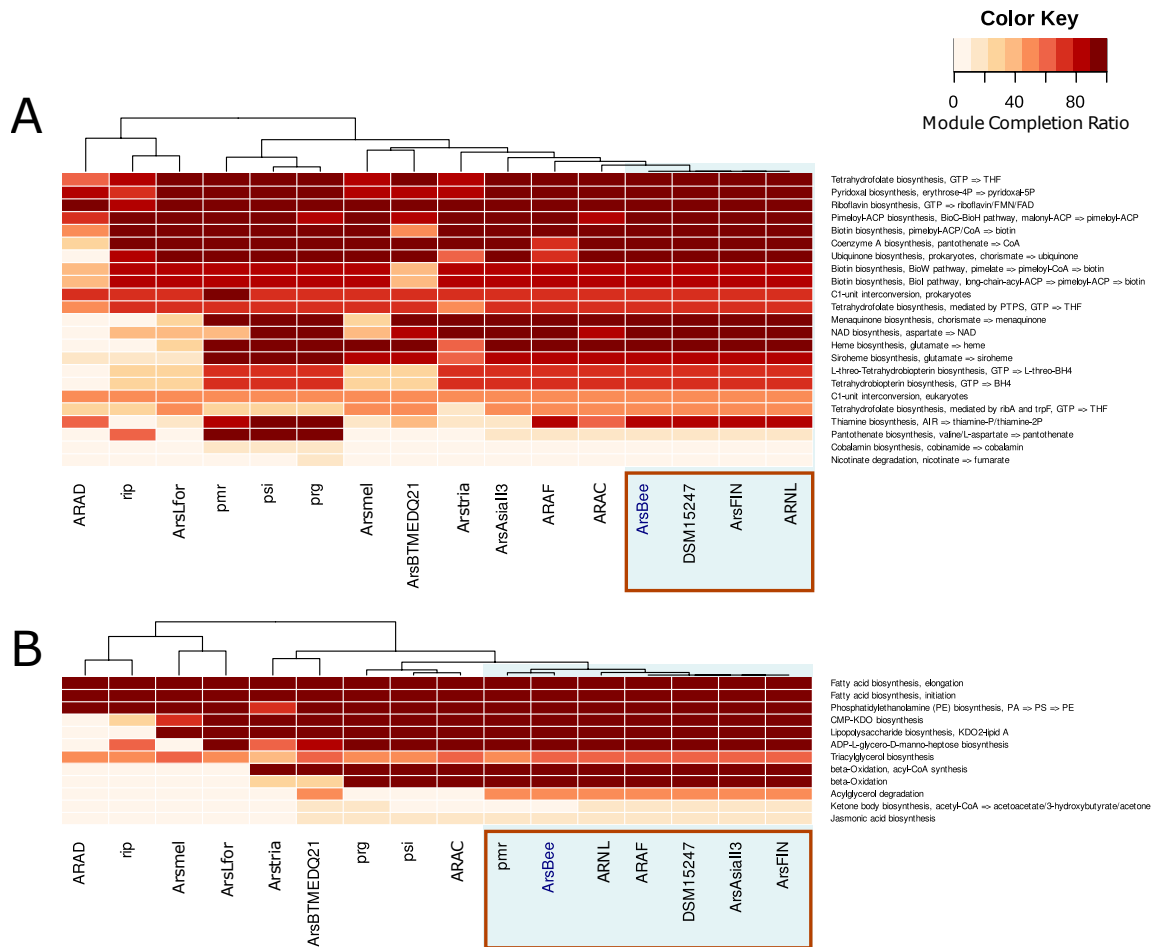

158

159 **SI Fig.4 The metabolic potential of *Arsenophonus* strains and comparison to free-living or**  
160 **symbiotic relatives. (A) Metabolism of cofactors and vitamins and (B) lipid and glycan metabolism.**  
161 The module completion ratio (MCR) for each KEGG functional category was calculated using  
162 Genomaple-2.3.2. Dendrograms represent hierarchical clustering of the analysed microbial genomes  
163 based on the MCRs values. The clustering of *ArsBeeCH* strain with previously sequenced  
164 *Arsenophonus nasoniae* strains is highlighted. pmr: *Proteus mirabilis* HI4320, psi: *Providencia stuartii*  
165 MRSN 2154, prg: *Providencia rettgeri* RB151, rip: *Candidatus Riesia pediculicola*, ArSFIN:  
166 *Arsenophonus nasoniae* (FIN), ArBeeCH: *Arsenophonus* of *Apis mellifera*, DSM15247:  
167 *Arsenophonus nasoniae* (DSM15247), Arsmel: *Arsenophonus melophagi*, Arslfor: *Arsenophonus* of  
168 *Lipoptena fortisetosa*, ARAD; *Arsenophonus* of *Aleurodicus dispersus*, Arstria: *Candidatus*  
169 *Arsenophonus triatominarum*, ARAF: *Arsenophonus* of *Aleurodicus floccissimus*, ArSAsiall3:  
170 *Arsenophonus* of *Bemisia tabaci* Asia II 3, ArSBTMDQ21: *Arsenophonus* of *Bemisia tabaci* Q2,  
171 ARAF: *Arsenophonus* of *Aphis craccivora*, ARNL: *Arsenophonus* of *Nilaparvata lugens*. Due to its  
172 highly fragmented status (818 contigs) the genome of *Arsenophonus* of *Entylia carinata* (ENCA) was  
173 excluded from this analysis.

174

175



176

177

178

179

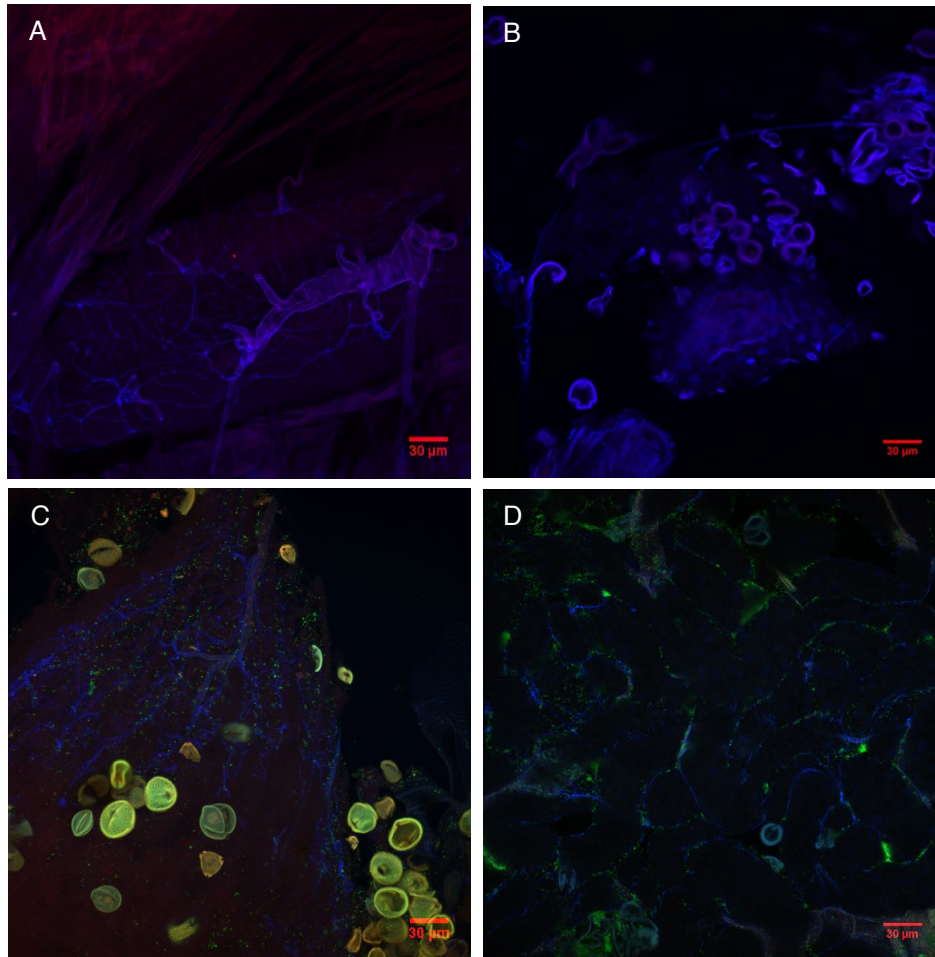

180

181 **SI Fig. 5 Confocal microscopy images of whole mounted honey bee guts from colonies with no**

182 **evidence of *Arsenophonus* association.** Negative control mages were obtained using whole gut

183 mounts from *Arsenophonus* negative honey bee workers. These visualisations were used to assess if

184 signals from tissue autofluorescence or inadequate washing would generate non-specific signals from

185 the *Arsenophonus* specific probe (red fluoresence). The absence of significant red signal suggests

186 this was not of concern. Honey bee whole guts (A, B, C, D) were counterstained with DAPI

187 (blue fluoresence) and symbiont DNA targeted by an *Arsenophonus* specific probe

188 (TCATGACCACAACCTCCA) [14] 5' labelled with a Alexa Fluor 647 fluorochrome (red fluoresence,

189 not visible). A universal bacterial FISH probe is shown highlighting other bacterial members of the gut

190 in green fluoresence (C & D only) (TGCTGCCTCCCGTAGGA) [16], 5' tagged with a Alexa Fluor 555

191 fluorochrome. Images were obtained using a ZEISS LSM 880 confocal microscope with a x 40

192 objective and processed using Image J [17].

193

194

195

196

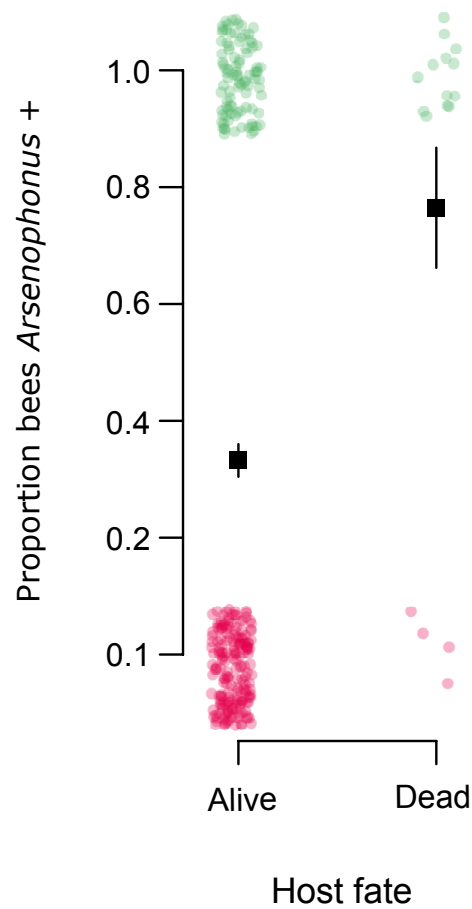

197

198 **SI Fig. 6 Association between *Arsenophonus* status and honey bee fate.** *Arsenophonus*  
199 prevalence was higher among individuals that died (n=17), compared to those that remained alive  
200 (n=283), during the course of the horizontal transmission study. Pink dots (0 = individual  
201 *Arsenophonus* -) and green dots (1 = individual *Arsenophonus* +). Errors bars indicate binomial SE.  
202

203

204

205

206

207

208

209

210

## Selection tables & parameter estimates from statistical models

211

212

**SI Tab. 2** Model selection & parameter estimates for spatial & seasonal dynamics of *Arsenophonus* in honey bee colonies

| <b>Model structure</b> <sup>GLMM</sup>                                                       | <b>df</b>   | <b>AIC</b>  | <b>Loglik</b> | <b>Dev.</b>     |
|----------------------------------------------------------------------------------------------|-------------|-------------|---------------|-----------------|
| <i>Arsenophonus</i> status ~ Day of season <sup>3</sup> + (Year) + (County/Apiary/Colony.ID) | 8           | 256.7       | -120.4        | 240.7           |
| <i>Arsenophonus</i> status ~ Day of season <sup>3</sup> + (Year) + (Apiary/Colony.ID)        | 7           | 254.7       | -120.4        | 240.7           |
| <i>Arsenophonus</i> status ~ Day of season <sup>3</sup> + (Year) + (Apiary) <sup>SM</sup>    | 6           | 252.7       | -120.4        | 240.7           |
| <i>Arsenophonus</i> status ~ Day of season <sup>3</sup> + (Apiary)                           | 5           | 254.6       | -122.3        | 244.6           |
| <i>Arsenophonus</i> status ~ Day of season <sup>3</sup> + (Year)                             | 5           | 264.5       | -127.3        | 254.5           |
| <b>Fixed effect</b>                                                                          | <b>Est.</b> | <b>SE</b>   | <b>Z</b>      | <b>P</b>        |
| Intercept                                                                                    | -0.7423     | 0.4502      | -1.649        | 0.09920         |
| Day of season <sup>1</sup>                                                                   | 17.37       | 4.514       | 3.849         | 0.000118**<br>* |
| Day of season <sup>2</sup>                                                                   | -12.26      | 4.162       | -2.946        | 0.003223**      |
| Day of season <sup>3</sup>                                                                   | -7.736      | 3.495       | -2.213        | 0.02687*        |
| <b>Random effect</b>                                                                         | <b>N</b>    | <b>Var.</b> | <b>SD</b>     |                 |
| Apiary                                                                                       | 45          | 1.155       | 1.075         |                 |
| Year                                                                                         | 5           | 0.4944      | 0.7031        |                 |

Note, day of the season (March 20<sup>th</sup> = day 0, November 8<sup>th</sup> = day 232) was modelled as a fixed effect 3<sup>rd</sup> order polynomial. A total of 229 observations of *Arsenophonus* status were included in the analysis. <sup>SM</sup> Selected model, <sup>df</sup> Degrees of freedom, <sup>AIC</sup> Akaike's information criterion, <sup>Dev.</sup> Deviance, <sup>Est.</sup> Coefficient estimate, <sup>Var.</sup> Variance. ( $P < ***0.001$ , \*\*0.01, \*0.05)

213

**SI Tab. 3** Model selection & parameter estimates for *Arsenophonus* loss in individuals removed from the colony & foraging environment

| <b>Model structure</b> <sup>GLMM</sup>                               | <b>df</b>   | <b>AIC</b>  | <b>Loglik</b> | <b>Dev.</b> |
|----------------------------------------------------------------------|-------------|-------------|---------------|-------------|
| <i>Arsenophonus</i> status ~ Time * Colony + Treatment + (1   Pot)   | 6           | 100.7       | -44.3         | 88.7        |
| <i>Arsenophonus</i> status ~ Time * Colony + (1   Pot)               | 5           | 98.94       | -44.5         | 88.9        |
| <i>Arsenophonus</i> status ~ Time + Colony + (1   Pot) <sup>SM</sup> | 4           | 97.52       | -44.8         | 89.5        |
| <i>Arsenophonus</i> status ~ Time + (1   Pot)                        | 3           | 115.8       | -54.9         | 109.8       |
| <b>Fixed effect</b>                                                  | <b>Est.</b> | <b>SE</b>   | <b>Z</b>      | <b>P</b>    |
| Intercept                                                            | 6.661       | 1.384       | 4.813         | < 0.001***  |
| Time                                                                 | -0.3736     | 0.0739      | -5.055        | < 0.001***  |
| Colony (Colony B)                                                    | -3.615      | 1.058       | -3.414        | < 0.001***  |
| <b>Random effect</b>                                                 | <b>N</b>    | <b>Var.</b> | <b>SD</b>     |             |
| Pot                                                                  | 19          | 0.9725      | 0.9862        |             |

<sup>SM</sup> Selected model, <sup>df</sup> Degrees of freedom, <sup>AIC</sup> Akaike's information criterion, <sup>Dev.</sup> Deviance, <sup>Est.</sup> Coefficient estimate, <sup>Var.</sup> Variance. (P < \*\*\*0.001, \*\*0.01, \*0.05)

214

215

**SI Tab.4** Horizontal transmission of *Arsenophonus* in honey bees under two social conditions

| <b>Model structure</b> <sup>GLMM</sup>                                                 | <b>df</b>   | <b>AIC</b>  | <b>Loglik</b> | <b>Dev.</b> |
|----------------------------------------------------------------------------------------|-------------|-------------|---------------|-------------|
| <i>Arsenophonus</i> status ~ Bee status * Transmission + Colony + Fate + (1  Pot)      | 9           | 307.2       | -144.6        | 289.2       |
| <i>Arsenophonus</i> status ~ Bee status + Transmission + Colony + Fate + (1  Pot)      | 8           | 306.2       | -145.1        | 290.2       |
| <i>Arsenophonus</i> status ~ Bee status + Transmission + Fate + (1  Pot) <sup>SM</sup> | 5           | 303.3       | -146.7        | 293.4       |
| <i>Arsenophonus</i> status ~ Bee status + Transmission + (1  Pot)                      | 4           | 309.0       | -150.5        | 300.9       |
| <i>Arsenophonus</i> status ~ Bee status + Fate + (1  Pot)                              | 4           | 306.6       | -149.3        | 298.6       |
| <b>Fixed effect</b>                                                                    | <b>Est.</b> | <b>SE</b>   | <b>Z</b>      | <b>P</b>    |
| Intercept                                                                              | -1.612      | 0.5545      | -2.907        | 0.00365 **  |
| Status (NEW)                                                                           | -0.5058     | 0.3298      | -1.534        | 0.1251      |
| Transmission (General contact)                                                         | 1.842       | 0.7714      | 2.387         | 0.01697 *   |
| Fate (Dead)                                                                            | 1.930       | 0.7385      | 2.613         | 0.00898 **  |
| <b>Random effect</b>                                                                   | <b>N</b>    | <b>Var.</b> | <b>SD</b>     |             |
| Pot                                                                                    | 20          | 2.371       | 1.54          |             |

Bee status = Worker or NEW, Transmission = Gen contact or Trophallaxis, Fate = Dead or Alive. Total observations (N = 300). <sup>SM</sup> Selected model, <sup>df</sup> Degrees of freedom, <sup>AIC</sup> Akaike's information criterion, <sup>Dev.</sup> Deviance, <sup>Est.</sup> Coefficient estimate, <sup>Var.</sup> Variance. (P < \*\*\*0.001, \*\*0.01, \*0.05)

216

217

218  
219  
220  
221  
222  
223  
224  
225  
226  
227  
228  
229  
230  
231  
232  
233  
234  
235  
236  
237  
238  
239  
240  
241  
242

### Supplementary References

1. Lartillot N, Rodrigue N, Stubbs D, Richer J. PhyloBayes MPI: Phylogenetic Reconstruction with Infinite Mixtures of Profiles in a Parallel Environment. *Syst Biol* 2013; **62**: 611–615.
2. Emms DM, Kelly S. OrthoFinder: solving fundamental biases in whole genome comparisons dramatically improves orthogroup inference accuracy. *Genome Biol* 2015; **16**: 157.
3. Nguyen L-T, Schmidt HA, von Haeseler A, Minh BQ. IQ-TREE: A Fast and Effective Stochastic Algorithm for Estimating Maximum-Likelihood Phylogenies. *Mol Biol Evol* 2015; **32**: 268–274.
4. Kalyaanamoorthy S, Minh BQ, Wong TKF, von Haeseler A, Jermiin LS. ModelFinder: fast model selection for accurate phylogenetic estimates. *Nat Methods* 2017; **14**: 587–587.
5. Hoang DT, Chernomor O, von Haeseler A, Minh BQ, Vinh LS. UFBoot2: Improving the Ultrafast Bootstrap Approximation. *Mol Biol Evol* 2018; **35**: 518–522.
6. Takami H, Taniguchi T, Arai W, Takemoto K, Moriya Y, Goto S. An automated system for evaluation of the potential functionome: MAPLE version 2.1.0. *DNA Res* 2016; **23**: 467–475.
7. Huerta-Cepas J, Szklarczyk D, Heller D, Hernández-Plaza A, Forslund SK, Cook H, et al. eggNOG 5.0: a hierarchical, functionally and phylogenetically annotated orthology resource based on 5090 organisms and 2502 viruses. *Nucleic Acids Res* 2019; **47**: D309–D314.
8. Cabanettes F, Klopp C. D-GENIES: dot plot large genomes in an interactive, efficient and simple way. *PeerJ* 2018; **6**: e4958.

- 243 9. Li H. Minimap2: pairwise alignment for nucleotide sequences. *Bioinformatics*  
244 2018; **34**: 3094–3100.
- 245 10. R Core Team. A language and environment for statistical computing. R  
246 Foundation for Statistical Computing, Vienna, Austria. URL [http://www.R-](http://www.R-project.org/)  
247 [project.org/](http://www.R-project.org/). *HttpwwwR-Proj* 2013; 2013–2013.
- 248 11. Wickham H. ggplot2: Elegant Graphics for Data Analysis. 2009. Springer-Verlag  
249 New York.
- 250 12. Subramanian B, Gao S, Lercher MJ, Hu S, Chen W-H. Evolveview v3: a  
251 webserver for visualization, annotation, and management of phylogenetic trees.  
252 *Nucleic Acids Res* 2019; **47**: W270–W275.
- 253 13. Duron O, Wilkes TE, Hurst GDD. Interspecific transmission of a male-killing  
254 bacterium on an ecological timescale. *Ecol Lett* 2010; **13**: 1139–1148.
- 255 14. Gottlieb Y, Ghanim M, Gueguen G, Kontsedalov S, Vavre F, Fleury F, et al.  
256 Inherited intracellular ecosystem: symbiotic bacteria share bacteriocytes in  
257 whiteflies. *FASEB J* 2008; **22**: 2591–2599.
- 258 15. Gilliam M. Microbial Sterility of the Intestinal Content of the Immature Honey  
259 Bee, *Apis mellifera*<sup>1,2,3</sup>. *Ann Entomol Soc Am* 1971; **64**: 315–316.
- 260 16. Martinson VG, Moy J, Moran NA. Establishment of characteristic gut bacteria  
261 during development of the honeybee worker. *Appl Environ Microbiol* 2012; **78**:  
262 2830–2840.
- 263 17. Schneider CA, Rasband WS, Eliceiri KW. NIH Image to ImageJ: 25 years of  
264 image analysis. *Nat Methods* 2012; **9**: 671–675.
- 265
- 266
